# Supplementary material
Source: publisher site journal article supplement (https://www.kjim.org/upload/media/kjim-2025-224-Supplementary-Table-1.pdf)
Supplement: Supplementary file 1 [file kjim-2025-224-Supplementary-Table-1.pdf]

**Supplementary Table 1. Mutations relevant to multiple myeloma biology**

ABCF1, ACTG1, ARID1A, ARID2, ATM, ATRX, BCL7A, BHLHE41, BRAF, BTG1, CCND1, CDKN1B, CDKN2C, CREBBP, CYLD, DIS3, DNMT3A, DTX1, DUSP2, EGR1, EP300, FAM46C, FGFR3, FUBP1, HIST1H1B, HIST1H1D, HIST1H1E, HIST1H2BK, HUWE1, IDH1, IDH2, IRF1, IRF4, KDM5C, KDM6A, KLHL6, KMT2B, KMT2C, KRAS, LCE1D, LTB, MAF, MAFB, MAML2, MAN2C1, MAX, NCOR1, NF1, NFKB2, NFKBIA, NRAS, PABPC1, PIK3CA, PIM1, POT1, PRDM1, PRKD2, PTPN11, RASA2, RB1, RFTN1, RPL10, RPL5, RPRD1B, RPS3A, SAMHD1, SETD2, SF3B1, SP140, TBC1D29, TCL1A, TET2, TGDS, TP53, TRAF2, TRAF3, UBR5, XBP1, ZFP36L1, ZNF292
